# Supplementary material for: Stepwise double excited-state proton transfer is not possible in 7-azaindole dimer
Source: PubMed Central journal article supplement (PMC5947511; doi:10.1039/c5sc01902h), 2015-07-08
Supplement: SC-006-C5SC01902H-s001.pdf [file SC-006-C5SC01902H-s001.pdf]

ELECTRONIC SUPPLEMENTARY INFORMATION - ESI

**Stepwise Double Excited-State Proton Transfer  
Is Not Possible in 7-Azaindole**

Rachel Crespo-Otero, Nawee Kungwan, Mario Barbatti

**LIST OF CONTENTS**

|              |                                                        |    |
|--------------|--------------------------------------------------------|----|
| SECTION S1.  | SURVEY OF EXPERIMENTAL DATA .....                      | 2  |
| SECTION S2.  | COMPUTATIONAL METHODS .....                            | 4  |
| SECTION S3.  | GEOMETRIES.....                                        | 6  |
| SECTION S4.  | VERTICAL EXCITATIONS AND ABSORPTION SPECTRUM .....     | 8  |
| SECTION S5.  | ENERGIES AND OSCILLATOR STRENGTHS.....                 | 9  |
| SECTION S6.  | THE $\Delta R_1 - \Delta R_2$ PLANE .....              | 12 |
| SECTION S7.  | EXAMPLES OF TRAJECTORIES .....                         | 14 |
| SECTION S8.  | TIME EVOLUTION OF TRAJECTORIES .....                   | 16 |
| SECTION S9.  | ANALYSIS OF SPT FORMATION AND INTERNAL CONVERSION..... | 17 |
| SECTION S10. | ANALYSES OF PREVIOUS RESULTS .....                     | 18 |
| SECTION S11. | MULTIREFERENCE AND DOUBLE EXCITATIONS .....            | 20 |
| SECTION S12. | ADDITIONAL REFERENCES .....                            | 22 |
| SECTION S13. | CARTESIAN COORDINATES.....                             | 24 |

## SECTION S1. SURVEY OF EXPERIMENTAL DATA

**Table S1.** Survey of experimental results for the excited-state time-constants of 7AI dimer obtained using different experimental techniques and conditions. Long time constants (>10 ps) are not reported here, neither are results for deuterated species.

| $\tau_1$<br>(fs) | $\tau_2$<br>(ps) | Pump<br>(nm)     | Probe/Observ.<br>(nm) | Technique                                                                                 | Medium          | Year <sup>Ref.</sup>   |
|------------------|------------------|------------------|-----------------------|-------------------------------------------------------------------------------------------|-----------------|------------------------|
| 650              | 3.3              | 310              | 620                   | Femtosecond Resolved                                                                      | Gas Phase       | 1995 <sup>1</sup>      |
| 360              | 1.7              | 307              | 620                   | Mass Spectroscopy (236 amu); Pulse: 60 fs, 0.5 mJ                                         |                 |                        |
| 200              | 1.6              | 305              | 620                   |                                                                                           |                 |                        |
| -                | << 5             | 310              | 310                   | Time Resolved Photoelectron Spectroscopy; Pulses: 0.8 ps, 0.5 ps                          | Gas Phase       | 1997 <sup>2</sup>      |
| 660              | 5.0              | 312              | 624                   | Time Resolved Coulomb Explosion; Detection: Ratio 119 amu /118 amu; Pulse: 120 fs, 2 mJ   | Gas Phase       | 1998 <sup>3, 4</sup>   |
| -                | ~2.0             | 0-0              | -                     | Disperse Fluorescence (Frequency-domain)                                                  | Gas Phase       | 2005 <sup>5</sup>      |
| -                | 1.9              | 0-0              | 620                   | Picosecond Resolved                                                                       | Gas Phase       | 2005 <sup>6</sup>      |
| -                | 0.86             | 1 $\sigma$       | 620                   | Resonance Enhanced Multiphoton Ionization; Pulse: 2.7 ps                                  |                 |                        |
| -                | << 5             | 263.5            | 450-560               | Time Resolved Fluorescence Spectroscopy; Pulse: 3-6 ps, 0.1 mJ                            | 3-Methylpentane | 1979 <sup>7</sup>      |
| -                | 1.4              | 608              | 480                   | Femtosecond Fluorescence Up-Conversion; Pulse: 250 fs, 400 $\mu$ J                        | Hexadecane      | 1991 <sup>8</sup>      |
| -                | 1.4              | 312 <sup>9</sup> | 375, 500              | Transient Absorption                                                                      |                 |                        |
| 200              | 1.1              | 270              | 320-620               | Femtosecond Fluorescence Up-Conversion; Pulse: 280 fs                                     | Hexane          | 1997 <sup>10, 11</sup> |
| 200              | 1.0              | 306              | 360                   | Femtosecond                                                                               | Hexadecane      | 1998 <sup>12</sup>     |
| -                | 1.0              | 306              | 480                   | Fluorescence Up-Conversion; Pulse: 90 fs, 0.6 mJ                                          | 3-Methylpentane |                        |
| 130              | 1.2              | 320              | 394-460               | Femtosecond Time Resolved Absorption; Pulse: 90 fs, 0.6 mJ                                | 3-Methylpentane | 1999 <sup>13</sup>     |
| -                | ~1.0             | 266              | 360-480               | Femtosecond Fluorescence Up-Conversion; Pulse: 90 fs, 0.6 mJ                              |                 |                        |
| 550              | 2.0-2.8          | 310              | 620                   | Time Resolved Coulomb Explosion; Detection: Ratio 119 amu /118 amu; Pulse: 200 fs, 1.5 mJ | Water clusters  | 1999 <sup>14</sup>     |

|     |     |         |     |                                                  |                                           |                    |
|-----|-----|---------|-----|--------------------------------------------------|-------------------------------------------|--------------------|
| 200 | 1.1 | 280,287 | 380 | Femtosecond                                      | Hexane                                    | 2007 <sup>15</sup> |
| -   | 1.1 | 313     | 380 | Fluorescence Up-<br>Conversion; Pulse: 290<br>fs |                                           |                    |
| -   | 1.1 | 313     | 380 | Femtosecond Time<br>Resolved Fluorescence        | n-Heptane,<br>n-Dodecane,<br>n-Hexadecane | 2007 <sup>16</sup> |
| -   | 2.2 | 313     | 380 |                                                  | Acetonitrile                              |                    |

## SECTION S2. COMPUTATIONAL METHODS

Excited states were computed with the coupled cluster to approximated second order (CC2)<sup>17-19</sup> and with the algebraic diagrammatic construction to the second order [ADC(2)],<sup>20, 21</sup> both using the resolution-of-the-identity (RI) approximation.<sup>19</sup> In the case of the ADC(2), the corresponding ground state was computed at the second-order Møller-Plesset Perturbation Theory (MP2).<sup>18</sup> CC2 calculations were done with the TZVP basis set.<sup>22</sup> ADC(2) calculations were done with the SV(P) and TZVP basis sets. Frozen 1s cores were used in both, CC2 and ADC(2), during geometry optimizations and single point calculations. Additional calculations were done with the time-dependent functional theory (TDDFT), using the long-range corrected functional LC-BLYP.<sup>23-25</sup>

Transition states were computed in the excited states based on numerical Hessians. Due to the high computational costs of these calculations, the Hessians were always computed with ADC(2)/SV(P). The Hessians were also always recomputed after optimization was reached. Conical intersections were optimized with the penalty Lagrange multiplier technique ( $\alpha = 0.02$  Hartree) implemented in the CIOPT program,<sup>26</sup> which we have adapted to work with CC2 and ADC(2).

Exploratory dynamics simulations in the excited states were also computed. First, the absorption spectrum was simulated at the ADC(2)/SV(P) level with the nuclear ensemble method.<sup>27</sup> Initial conditions were sampled from two energy windows in the spectrum:  $4.1 \pm 0.1$  eV (A) and  $4.7 \pm 0.1$  eV (B). The initial states were determined according to the distribution of oscillator strengths within each window. In window A, 20 trajectories were initiated in  $S_1$ . In window B, 7 trajectories were initiated in  $S_2$ , 12 in  $S_3$  and 5 in  $S_4$ , in a total of 24 trajectories. Due to the reduced number of trajectories, all dynamics results have low statistical significance and they should be understood as a qualitative exploration of the potential surfaces. For 90% confidence interval, all reported yields have maximum statistical uncertainties of  $\pm 18\%$ .

On-the-fly dynamic simulations were carried out on the excited states computed with the RI-ADC(2)/SV(P) level of theory. All electrons, including the 1s cores, were taken into account. Starting in window A, only the  $S_1$  state was considered. Starting in window B, all excited states up to  $S_4$  were included. Non-adiabatic effects were taken into account by the surface hopping approach.<sup>28</sup> Classical equations were integrated with 0.5 fs time step, while quantum equations were integrated with 0.025 fs using interpolated quantities between classical steps. The maximum simulation time was 1000 fs. Hopping probabilities between excited states were computed with the fewest switches approach<sup>29</sup> including decoherence corrections ( $\alpha = 0.1$  Hartree).<sup>30</sup>

Nonadiabatic couplings with ADC(2) were computed by finite differences with the method discussed in Ref.<sup>31</sup> based on the Hammes-Schiffer-Tully approach.<sup>32</sup> As a single reference method, ADC(2) cannot provide reliable nonadiabatic couplings for crossings with the ground state.<sup>31</sup> For this reason, when a trajectory reached an  $S_1$ - $S_0$  energy gap smaller than 0.1 eV before the maximum simulation time (1 ps), it was stopped. This crossing time was taken as an estimate of the internal conversion time to the ground state.

As usual in surface hopping,<sup>33</sup> no tunneling processes were computed. For the above-the-barrier excitations considered here, this is a minor approximation as ballistic processes should dominate the excited state relaxation.

CC2 and ADC(2) calculations were carried out with the TURBOMOLE program.<sup>34</sup> The spectrum and dynamics simulations were performed with NEWTON-X<sup>35, 36</sup> interfaced with TURBOMOLE. TDDFT calculations were done with Gaussian 09.<sup>37</sup>

## SECTION S3. GEOMETRIES

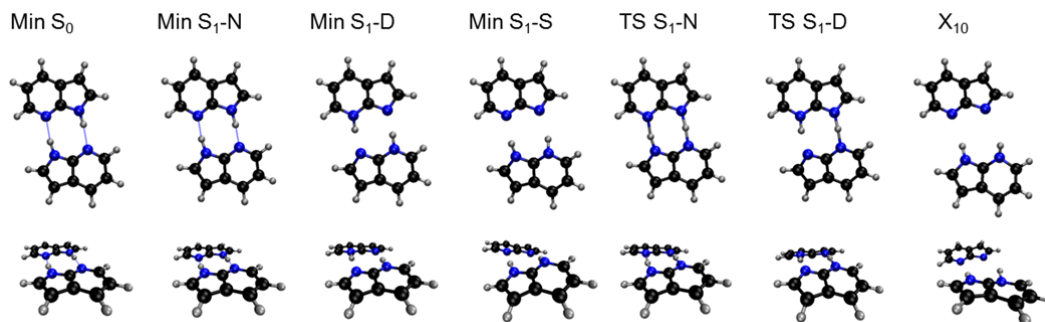

Fig. S1. Geometry of stationary points and conical intersection. Ground and excited state minima (Min), transition states (TS) on the  $S_1$  state and conical intersections (X) between  $S_0$  and  $S_1$  were optimized with CC2/TZVP, ADC(2)/TZVP and ADC(2)/SV(P) levels. Their Cartesian coordinates are given at the end of this document.

**Table S2.** Proton transfer coordinates for stationary structures and conical intersections computed at diverse levels.

| Geometry      | ADC(2)/SV(P)                  |                              |                              |                               |                  |                  |
|---------------|-------------------------------|------------------------------|------------------------------|-------------------------------|------------------|------------------|
|               | $R_{\text{N1H}}^{\alpha}$ (Å) | $R_{\text{N6H}}^{\beta}$ (Å) | $R_{\text{N1H}}^{\beta}$ (Å) | $R_{\text{N6H}}^{\alpha}$ (Å) | $\Delta R_1$ (Å) | $\Delta R_2$ (Å) |
| Min $S_0$     | 1.043                         | 1.884                        | 1.043                        | 1.885                         | -0.84            | -0.84            |
| Min $S_1$ -N  | 1.085                         | 1.681                        | 1.072                        | 1.698                         | -0.60            | -0.63            |
| Min $S_1$ -S  | 2.161                         | 1.024                        | 1.024                        | 2.119                         | 1.14             | -1.10            |
| Min $S_1$ -D  | 1.830                         | 1.054                        | 1.829                        | 1.050                         | 0.78             | 0.78             |
| $X_{10}$      | 2.834                         | 1.018                        | 1.014                        | 2.442                         | 1.82             | -1.43            |
| TS $S_1$ -N   | 1.261                         | 1.335                        | 1.157                        | 1.472                         | -0.07            | -0.32            |
| TS $S_1$ -D   | 1.198                         | 1.402                        | 1.797                        | 1.055                         | -0.20            | 0.74             |
| Monomer $S_1$ | 1.020                         | $\infty$                     | 1.020                        | $\infty$                      | $-\infty$        | $-\infty$        |
| Geometry      | ADC(2)/TZVP                   |                              |                              |                               |                  |                  |
|               | $R_{\text{N1H}}^{\alpha}$ (Å) | $R_{\text{N6H}}^{\beta}$ (Å) | $R_{\text{N1H}}^{\beta}$ (Å) | $R_{\text{N6H}}^{\alpha}$ (Å) | $\Delta R_1$ (Å) | $\Delta R_2$ (Å) |
| Min $S_0$     | 1.033                         | 1.879                        | 1.033                        | 1.879                         | -0.85            | -0.85            |
| Min $S_1$ -N  | 1.074                         | 1.671                        | 1.059                        | 1.701                         | -0.60            | -0.64            |
| Min $S_1$ -S  | 2.169                         | 1.018                        | 1.015                        | 2.104                         | 1.15             | -1.09            |
| Min $S_1$ -D  | 1.825                         | 1.043                        | 1.818                        | 1.041                         | 0.78             | 0.78             |
| $X_{10}$      | 2.857                         | 1.012                        | 1.007                        | 2.446                         | 1.85             | -1.44            |
| TS $S_1$ -N   | 1.260                         | 1.312                        | 1.126                        | 1.498                         | -0.05            | -0.37            |
| TS $S_1$ -D   | 1.198                         | 1.371                        | 1.785                        | 1.046                         | -0.17            | 0.74             |
| Monomer $S_1$ | 1.012                         | $\infty$                     | 1.012                        | $\infty$                      | $-\infty$        | $-\infty$        |

| CC2/TZVP                               |                               |                              |                              |                               |                  |                  |
|----------------------------------------|-------------------------------|------------------------------|------------------------------|-------------------------------|------------------|------------------|
| Geometry                               | $R_{\text{NIH}}^{\alpha}$ (Å) | $R_{\text{NGH}}^{\beta}$ (Å) | $R_{\text{NIH}}^{\beta}$ (Å) | $R_{\text{NGH}}^{\alpha}$ (Å) | $\Delta R_1$ (Å) | $\Delta R_2$ (Å) |
| Min $S_0$                              | 1.037                         | 1.867                        | 1.037                        | 1.867                         | -0.83            | -0.83            |
| Min $S_1$ -N                           | 1.082                         | 1.653                        | 1.065                        | 1.689                         | -0.57            | -0.62            |
| Min $S_1$ -S                           | 2.157                         | 1.020                        | 1.017                        | 2.093                         | 1.14             | -1.08            |
| Min $S_1$ -D                           | 1.814                         | 1.046                        | 1.809                        | 1.044                         | 0.77             | 0.77             |
| $X_{10}$                               | 2.883                         | 1.019                        | 1.009                        | 2.459                         | 1.86             | -1.45            |
| TS $S_1$ -N                            | 1.249                         | 1.328                        | 1.132                        | 1.491                         | -0.08            | -0.36            |
| TS $S_1$ -D                            | 1.197                         | 1.376                        | 1.778                        | 1.049                         | -0.18            | 0.73             |
| Monomer $S_1$                          | 1.013                         | $\infty$                     | 1.013                        | $\infty$                      | $-\infty$        | $-\infty$        |
| CASSCF(12,12)/6-31G(d,p) <sup>38</sup> |                               |                              |                              |                               |                  |                  |
| Geometry                               | $R_{\text{NIH}}^{\alpha}$ (Å) | $R_{\text{NGH}}^{\beta}$ (Å) | $R_{\text{NIH}}^{\beta}$ (Å) | $R_{\text{NGH}}^{\alpha}$ (Å) | $\Delta R_1$ (Å) | $\Delta R_2$ (Å) |
| Min $S_0$ ( $AD_{S_0}$ )               | 1.002                         | 2.142                        | 1.002                        | 2.142                         | -1.14            | -1.14            |
| Min $S_1$ -N ( $AD_{S_1}$ )            | 1.004                         | 2.108                        | 1.005                        | 2.072                         | -1.10            | -1.07            |
| Min $S_1$ -S ( $DI_N$ )                | 2.307                         | 0.995                        | 0.996                        | 2.331                         | 1.31             | -1.34            |
| Min $S_1$ -D ( $TD_{S_1}$ )            | 2.098                         | 1.006                        | 2.119                        | 1.000                         | 1.09             | 1.12             |
| TS $S_1$ -N ( $DI_{TS}$ )              | 1.232                         | 1.325                        | 1.232                        | 1.325                         | -0.09            | -0.09            |
| $DI_1$                                 | 1.018                         | 1.889                        | 1.103                        | 1.558                         | -0.87            | -0.46            |

## SECTION S4. VERTICAL EXCITATIONS AND ABSORPTION SPECTRUM

**Table S3.** Vertical excitation energies and oscillator strengths of the  $C_{2h}$  7AI dimer at the  $S_0$  minimum computed with different methods.

|       | ADC(2)/SV(P)    |       | ADC(2)/TZVP     |       | CC2/TZVP        |       | Assignment           |
|-------|-----------------|-------|-----------------|-------|-----------------|-------|----------------------|
|       | $\Delta E$ (eV) | $f$   | $\Delta E$ (eV) | $f$   | $\Delta E$ (eV) | $f$   |                      |
| $S_1$ | 4.667           | 0.112 | 4.568           | 0.112 | 4.577           | 0.100 | $\pi\pi^*$ ( $B_u$ ) |
| $S_2$ | 4.688           | 0.000 | 4.586           | 0.000 | 4.594           | 0.000 | $\pi\pi^*$ ( $A_g$ ) |
| $S_3$ | 4.880           | 0.000 | 4.778           | 0.000 | 4.777           | 0.000 | $\pi\pi^*$ ( $A_g$ ) |
| $S_4$ | 4.907           | 0.228 | 4.808           | 0.241 | 4.807           | 0.208 | $\pi\pi^*$ ( $B_u$ ) |
| $S_5$ |                 |       | 5.515           | 0.000 | 5.544           | 0.000 | $n\pi^*+\pi\pi^*$    |
| $S_6$ |                 |       | 5.519           | 0.005 | 5.547           | 0.005 | $n\pi^*+\pi\pi^*$    |
| $S_5$ | 6.266           | 0.000 |                 |       |                 |       | $\pi\pi^*$ ( $A_g$ ) |
| $S_6$ | 6.395           | 0.142 |                 |       |                 |       | $\pi\pi^*$ ( $B_u$ ) |

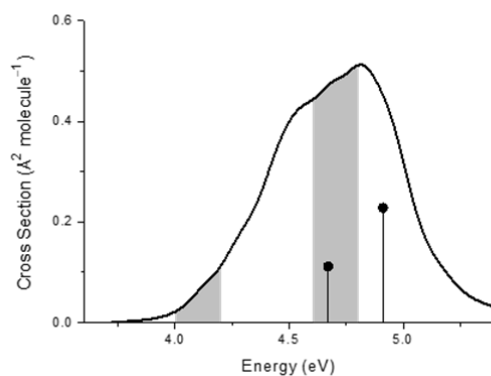

Fig. S2. 7AI dimer absorption spectrum simulated with the nuclear ensemble method.<sup>27</sup> A Wigner distribution with  $N_p = 500$  points was generated around the  $C_{2h}$   $S_0$  minimum structure.  $N_{fs} = 6$  excited states were included. The convolution was done with Gaussian functions with  $\delta = 0.1$  eV width. Excited states were computed with ADC(2)/SV(P). The shaded areas indicate the two windows from where initial conditions were selected,  $4.1 \pm 0.1$  eV (A) and  $4.7 \pm 0.1$  eV (B). Dots indicate the vertical excitation energies and oscillator strengths of the first two bright excited states ( $S_1$  and  $S_4$ ).



## SECTION S5. ENERGIES AND OSCILLATOR STRENGTHS

**Table S4.** Energies and oscillator strengths for stationary structures and conical intersections computed at diverse levels.

| ADC(2)/SV(P)                              |                     |                     |          |                     |                     |         |        |
|-------------------------------------------|---------------------|---------------------|----------|---------------------|---------------------|---------|--------|
| Geometry                                  | S <sub>0</sub> (au) | S <sub>1</sub> (au) | <i>f</i> | S <sub>0</sub> (eV) | S <sub>1</sub> (eV) | ΔE (eV) | λ (nm) |
| Min S <sub>0</sub>                        | -756.742421         | 0.171521            | 0.112    | 0.000               | 4.667               | 4.67    | 266    |
| Min S <sub>1</sub> -N                     | -756.724052         | 0.138362            | 0.078    | 0.500               | 4.265               | 3.77    | 329    |
| Min S <sub>1</sub> -S                     | -756.671753         | 0.050461            | 0.001    | 1.923               | 3.296               | 1.37    | 903    |
| Min S <sub>1</sub> -D                     | -756.697126         | 0.091062            | 0.019    | 1.233               | 3.710               | 2.48    | 500    |
| X <sub>10</sub>                           | -756.614386         | 0.000724            | -        | 3.484               | 3.504               | 0.02    | -      |
| TS S <sub>1</sub> -N                      | -756.707481         | 0.124556            | -        | 0.951               | 4.340               | 3.39    | -      |
| TS S <sub>1</sub> -D                      | -756.696712         | 0.111762            | -        | 1.244               | 4.285               | 3.04    | -      |
| Monomer S <sub>1</sub>                    | -756.694002         | 0.165250            | 0.085    | 1.318               | 5.814               | 4.50    | 276    |
| ADC(2)/TZVP                               |                     |                     |          |                     |                     |         |        |
| Geometry                                  | S <sub>0</sub> (au) | S <sub>1</sub> (au) | <i>f</i> | S <sub>0</sub> (eV) | S <sub>1</sub> (eV) | ΔE (eV) | λ (nm) |
| Min S <sub>0</sub>                        | -757.770212         | 0.167877            | 0.112    | 0.000               | 4.568               | 4.57    | 271    |
| Min S <sub>1</sub> -N                     | -757.750926         | 0.132584            | 0.074    | 0.525               | 4.133               | 3.61    | 344    |
| Min S <sub>1</sub> -S                     | -757.696095         | 0.042071            | 0.000    | 2.017               | 3.162               | 1.14    | 1083   |
| Min S <sub>1</sub> -D                     | -757.722914         | 0.084709            | 0.016    | 1.287               | 3.592               | 2.31    | 538    |
| X <sub>10</sub>                           | -757.648602         | 0.000675            | -        | 3.309               | 3.328               | 0.02    | -      |
| TS S <sub>1</sub> -N                      | -757.735055         | 0.119243            | -        | 0.957               | 4.201               | 3.24    | -      |
| TS S <sub>1</sub> -D                      | -757.721539         | 0.103277            | -        | 1.324               | 4.135               | 2.81    | -      |
| Monomer S <sub>1</sub>                    | -757.720380         | 0.158643            | 0.102    | 1.356               | 5.673               | 4.32    | 287    |
| CC2/TZVP                                  |                     |                     |          |                     |                     |         |        |
| Geometry                                  | S <sub>0</sub> (au) | S <sub>1</sub> (au) | <i>f</i> | S <sub>0</sub> (eV) | S <sub>1</sub> (eV) | ΔE (eV) | λ (nm) |
| Min S <sub>0</sub>                        | -757.810311         | 0.168186            | 0.100    | 0.000               | 4.577               | 4.58    | 271    |
| Min S <sub>1</sub> -N                     | -757.791186         | 0.133108            | 0.062    | 0.520               | 4.142               | 3.62    | 342    |
| Min S <sub>1</sub> -S                     | -757.739103         | 0.046988            | 0.002    | 1.938               | 3.216               | 1.28    | 970    |
| Min S <sub>1</sub> -D                     | -757.767061         | 0.089123            | 0.015    | 1.177               | 3.602               | 2.43    | 511    |
| X <sub>10</sub>                           | -757.686573         | 0.001358            | -        | 3.367               | 3.404               | 0.04    | -      |
| TS S <sub>1</sub> -N                      | -757.777423         | 0.121139            | -        | 0.895               | 4.191               | 3.30    | -      |
| TS S <sub>1</sub> -D                      | -757.764932         | 0.106737            | -        | 1.235               | 4.139               | 2.90    | -      |
| Monomer S <sub>1</sub>                    | -757.760249         | 0.159562            | 0.102    | 1.362               | 5.704               | 4.34    | 286    |
| CASPT2(16,14)/ANO <sup>38</sup>           |                     |                     |          |                     |                     |         |        |
| Geometry                                  | S <sub>0</sub> (au) | S <sub>1</sub> (au) | <i>f</i> | S <sub>0</sub> (eV) | S <sub>1</sub> (eV) | ΔE (eV) | λ (nm) |
| Min S <sub>0</sub> (AD <sub>S0</sub> )    |                     |                     |          | 0.000               | 4.020               | 4.02    | 308    |
| Min S <sub>1</sub> -N (AD <sub>S1</sub> ) |                     |                     |          | 0.180               | 3.870               | 3.69    | 336    |
| Min S <sub>1</sub> -S (DI <sub>N</sub> )  |                     |                     |          | 2.080               | 3.270               | 1.19    | 1042   |
| Min S <sub>1</sub> -D (TD <sub>S1</sub> ) |                     |                     |          | 1.444               | 3.594               | 2.15    | 577    |

|                                          |                                                                                                                     |
|------------------------------------------|---------------------------------------------------------------------------------------------------------------------|
| TS S <sub>1</sub> -N (DI <sub>TS</sub> ) | 4.520                                                                                                               |
| DI <sub>I</sub>                          | 4.27                                                                                                                |
| Expt. <sup>5,15</sup>                    |                                                                                                                     |
| Geometry                                 | S <sub>0</sub> (au)    S <sub>1</sub> (au) <i>f</i> S <sub>0</sub> (eV)    S <sub>1</sub> (eV)    ΔE (eV)    λ (nm) |
| Min S <sub>0</sub>                       |                                                                                                                     |
| Min S <sub>1</sub> -N                    |                                                                                                                     |
| Min S <sub>1</sub> -S                    |                                                                                                                     |
| Min S <sub>1</sub> -D                    |                                                                                                                     |

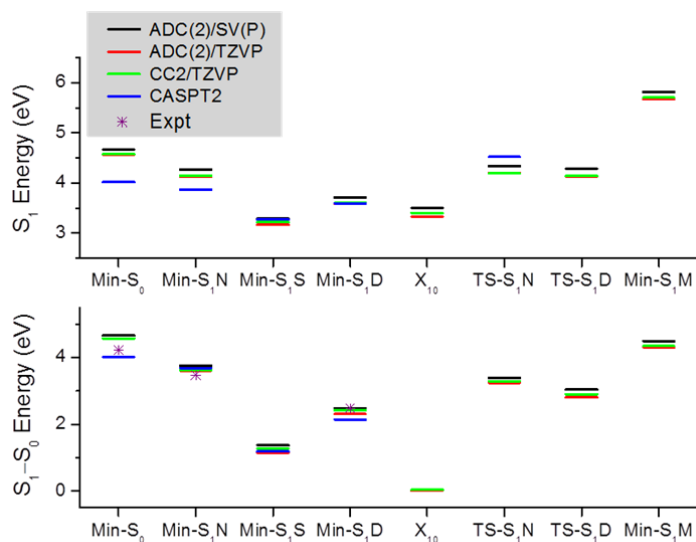

Fig. S3. Comparison of energies computed with different methods. CASPT2 results from Ref.<sup>38</sup>.

**Table S5.** Potential energy (eV) of the main features of the S<sub>1</sub> state computed with diverse methods, taking the S<sub>1</sub> energy of the Min S<sub>1</sub>-N as the reference.

| Method                      | Min S <sub>1</sub> -N | Min S <sub>1</sub> -S<br>(CT) | Min S <sub>1</sub> -S<br>(LE) | Min S <sub>1</sub> -D | X <sub>10</sub> | TS S <sub>1</sub> -N | TS S <sub>1</sub> -D |
|-----------------------------|-----------------------|-------------------------------|-------------------------------|-----------------------|-----------------|----------------------|----------------------|
| CC2 (This work)             | 0.00                  | -0.93                         | -                             | -0.54                 | -0.74           | 0.05                 | 0.00                 |
| CASPT2(16,14) <sup>38</sup> | 0.00                  | -0.60                         | 0.40                          | -0.28                 | -               | 0.65                 | -                    |
| MRMP(8,8) <sup>39</sup>     | 0.00                  | -                             | -                             | -0.23                 | -               | 0.19                 | -                    |
| TD-LCBYLP <sup>40</sup>     | 0.00                  | -0.21                         | -                             | -0.30                 | -               | 0.07                 | 0.26                 |
| CIS <sup>41</sup>           | 0.00                  | -0.06                         | 0.68                          | -0.18                 | -               | 0.75                 | 0.69                 |

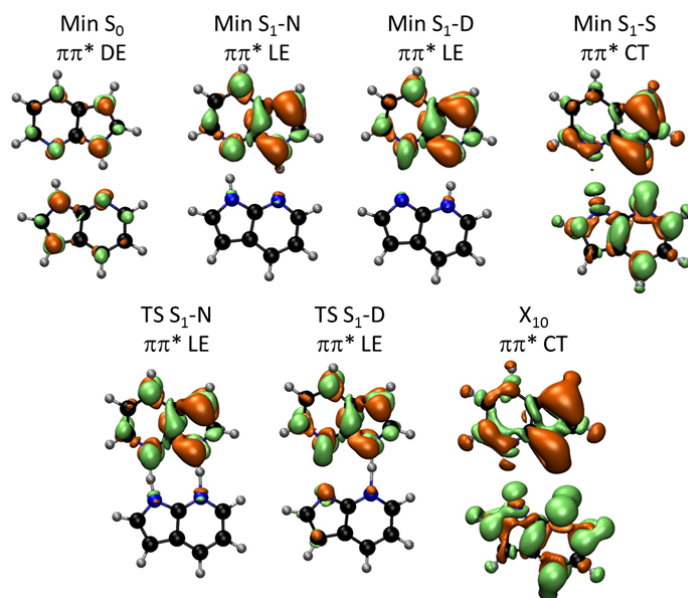

Fig. S4.  $S_1$ - $S_0$  Difference densities for all stationary points and conical intersection computed at CC2/TZVP. Orange – electron donor; green – electron acceptor. Based on these densities, states can be classified as delocalized (Deloc), localized (Loc), or charge transfer (CT).

## SECTION S6. THE $\Delta R_1 - \Delta R_2$ PLANE

The proton transfers in 7AI dimer can be conveniently discussed in terms of the  $\Delta R_1 - \Delta R_2$  plane defined by the internal coordinates

$$\Delta R_1 = R_{\text{N1H}}^\alpha - R_{\text{N6H}}^\beta,$$

$$\Delta R_2 = R_{\text{N1H}}^\beta - R_{\text{N6H}}^\alpha,$$

where  $R_{\text{N1H}}^m$  is the NH distance in the pyrrole group of monomer  $m$  and  $R_{\text{N6H}}^n$  is the NH distance in the pyridine group of monomer  $n$ . (Fig. S5-left). All stationary structures and conical intersections discussed in this work can be directly visualized in this plane (Fig. S5-center; see also Table S2).

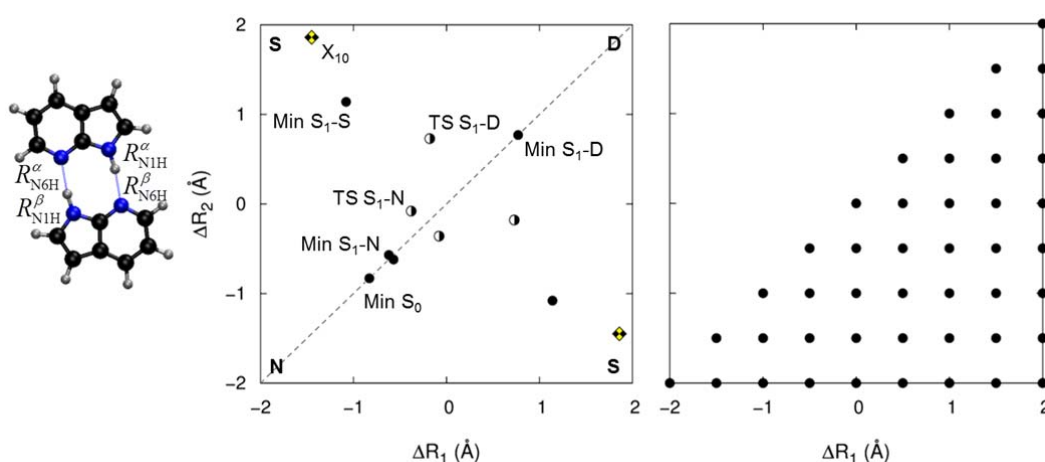

Fig. S5. (Left) Definition of internal coordinates. (Center) Stationary points and conical intersections are indicated by points on the  $\Delta R_1 - \Delta R_2$  plane. Structures are symmetric by reflection at the dashed line. The four quadrants are named **N** (normal), **S** (single PT), and **D** (double PT) according to the geometry of the tautomers in that region. (Right) The points indicate the 45 structures optimized in the  $S_1$  state. The upper half of the plane was obtained by symmetry, providing a total of 81 points.

The  $S_1$  geometries of 45 points on the  $\Delta R_1 - \Delta R_2$  plane were optimized by freezing  $\Delta R_1$  and  $\Delta R_2$  and relaxing all other coordinates. These optimizations were carried out first at ADC(2)/SV(P) level, and later refined at CC2/TZVP level. Excitation energies into the  $S_1$  state at both levels are shown in Fig. S6. There is a strong quantitative agreement between CC2 and ADC(2) energies. For further comparison between the two levels, see Section S5.

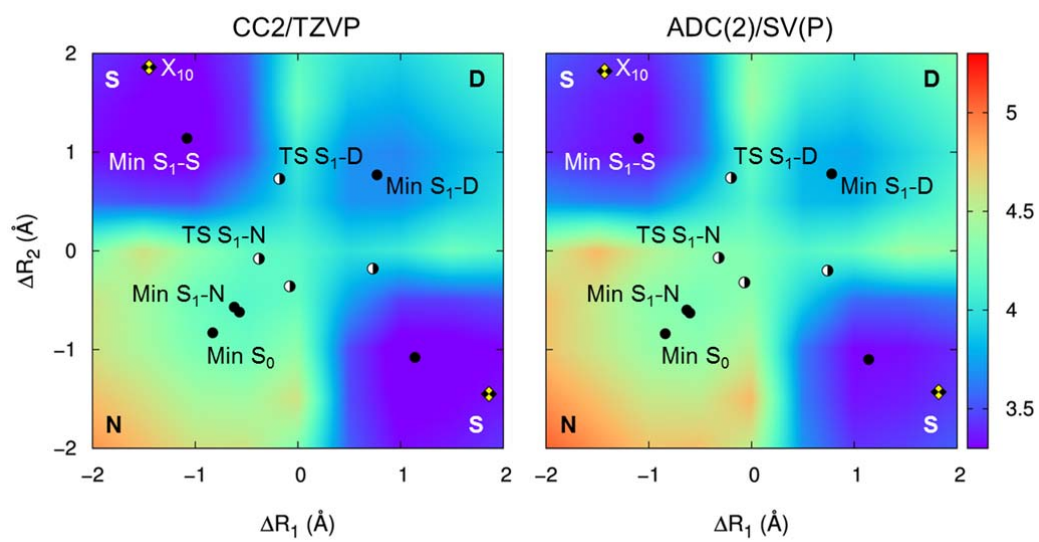

Fig. S6. Excitations energies (eV) into the  $S_1$  state. 81 optimized structures were included in each graph.

## SECTION S7. EXAMPLES OF TRAJECTORIES

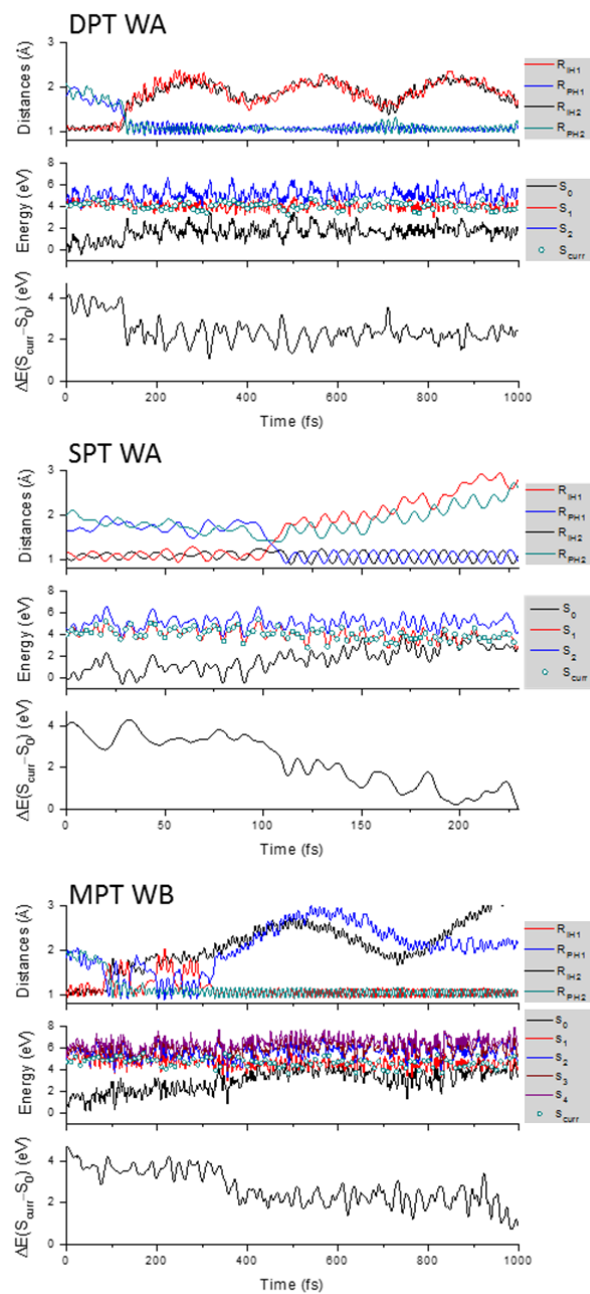

Fig. S7. Evolution of geometry and energies along three selected trajectories. Top: DPT (double proton transfer) is the most common case in both excitation windows. After the proton transfers at  $\sim 120$  fs, an oscillation with 500 fs period appears in the  $R_{IH}$  coordinates, reflecting the inter-monomer vibrations. Middle: SPT (single proton transfer) is quantitatively less important. After its occurrence, the trajectory tends to quickly find an intersection with  $S_0$ . Bottom: MPT (multiple proton transfer) trajectories always

start as a DPT, but an additional transfer occurs forming an S structure. As the SPT trajectories, after formation of S, the energy gap with  $S_0$  tends to decrease towards the intersection.

## SECTION S8. TIME EVOLUTION OF TRAJECTORIES

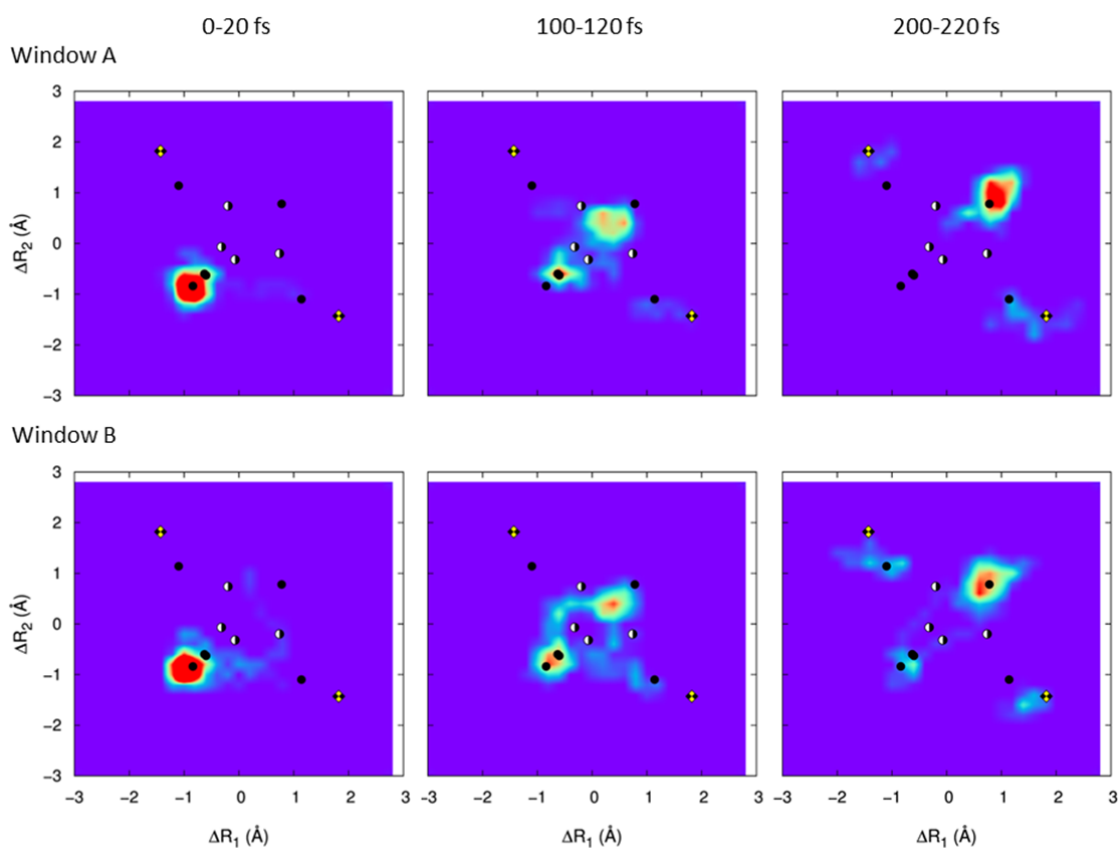

Fig. S8. Trajectory distribution in three different time intervals, 0-20 fs, 100-120 fs, and 200-220 fs, in window A (top) and B (bottom). Density grows from violet to red. Initially (left), the dimer is located at the **N** region. After 100 fs (center), trajectories are distributed around the diagonal connection **N** and **D** indicating the occurrence of asynchronous DPT. At 200 fs (right) most of population is at the **D** region, with a minor fraction at the **S** region.



## SECTION S9. ANALYSIS OF SPT FORMATION AND INTERNAL CONVERSION

**Table S6.** Characterization of the of single proton transfer structures formed in SPT and MPT trajectories.  $\tau_{\text{SPT}}$  is the time when the trajectory crosses to the single PT structure.  $\tau_{\text{X10}}$  is the time when the trajectory reaches the intersection with the ground state. If the intersection is not reached within 1 ps, the energy gap at this time is shown. In average, the crossing is reached  $140 \pm 68$  fs after the formation of the SPT structure. Three trajectories did not find the crossing with the ground state within 1 ps. Two of them ended with energy gaps below 1 eV, indicating that the crossing should be near. The third one ended with a large energy gap (2.3 eV). In this case, however, the SPT structure was formed at 991 fs, and the trajectory did not have enough time to relax.

| Window | Type | Traj      | $\tau_{\text{SPT}}$ (fs) | $\tau_{\text{X10}}$ (fs) |
|--------|------|-----------|--------------------------|--------------------------|
| WA     | SPT  | 1         | 118                      | 238                      |
|        |      | 2         | 11                       | 237                      |
|        |      | 3         | 105                      | 230                      |
| WB     | MPT  | 1         | 130                      | 259                      |
|        | SPT  | 1         | 89                       | 240                      |
|        |      | 2         | 12                       | 187                      |
|        | MPT  | 1         | 991                      | [2.3 eV]                 |
|        |      | 2         | 123                      | 301                      |
|        |      | 3         | 317                      | 563                      |
|        |      | 4         | 119                      | 310                      |
|        |      | 5         | 684                      | 723                      |
|        |      | 6         | 345                      | [0.97 eV]                |
| 7      |      | 153       | 257                      |                          |
| 8      | 408  | 424       |                          |                          |
| 9      | 926  | [0.82 eV] |                          |                          |

**SECTION S10. ANALYSES OF PREVIOUS RESULTS**

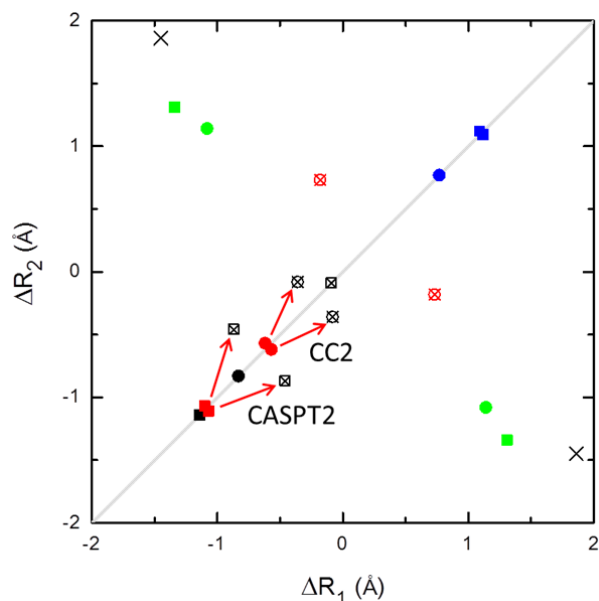

Fig. S9. Stationary points and conical intersections on the  $S_1$  state. Circles indicate CC2 results (present work) and squares indicate CASSCF geometries used for CASPT2 calculations in Ref.<sup>38</sup>. The crosses are the conical intersections with  $S_0$ . Inclusion of dynamic correlation in CC2 tends to displace all stationary points to central regions of the plane, as compared to CASSCF. The arrows in the CC2 results indicate the relation between the  $S_1$  minimum N (red circles) and the transition state I (crossed black circle). A similar set of arrows for CASSCF connects the  $S_1$  minimum N (red squares) to another  $S_1$  minimum (black crossed squares), which is claimed to be the intermediate to stepwise reactions.<sup>38</sup> Such intermediate, however, does not exist on the CC2 and ADC(2) surfaces. From the topographic relations in this figure, there is the possibility that the claimed intermediate is in fact a transition state, as they cannot be distinguished from minima during simple optimization procedures. Moreover, even if this intermediate minimum existed, its proximity to the main diagonal in the plane would make it more an intermediate for concerted reactions than for stepwise reactions.

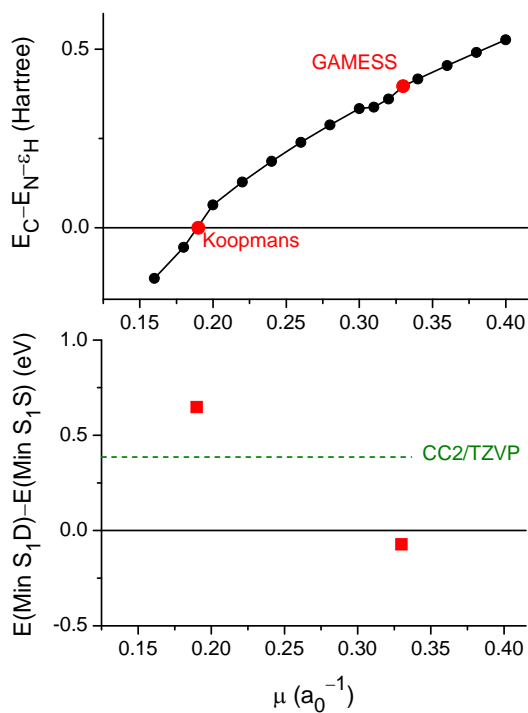

Fig. S10. Performance of TDDFT with the LC-BLYP functional. When LC-BLYP is used with a range-separation parameter of  $0.33 a_0^{-1}$  as recommended in Ref.<sup>42</sup> and implemented in GAMESS,<sup>43</sup> the  $S_1$ -excited S structure is slightly less stable than the D structure by 0.07 eV (Bottom graph). Accordingly, in Ref.<sup>40</sup>, where GAMESS was used, S was less stable than D by 0.09 eV. A non-empirical parameterization of the range-separation parameter following the method discussed in Ref.<sup>44</sup> (Top graph) indicates that a more adequate value for computing 7AI dimer is instead  $\mu = 0.19 a_0^{-1}$ . With this value, the S structure is more stable than the D structure by 0.65 eV, in qualitative agreement with the CC2 result (0.39 eV).

## SECTION S11. MULTIREFERENCE AND DOUBLE EXCITATIONS

As single-reference methods with approximated doubles, CC2 and ADC(2) may not perform well when either the ground state has multireference character or the excited state has large contributions from double excitations. To evaluate the present results for these potential shortcomings, we have computed the  $D_1$ ,  $D_2$ , and  $\% \tau_2$  diagnostics. The  $D_1$  diagnostic<sup>45</sup> measures the interaction between the Hartree-Fock (HF) reference state and singly-excited determinants. Large values of  $D_1$  indicate multireference character of the ground state. Analogously, the  $D_2$  diagnostic<sup>46</sup> measures the interaction between the HF reference and doubly-excited determinants, thus, high values indicate large contributions of double excitations to the ground state.  $\% \tau_2$  measures the contribution of double excitations to a particular excited state.<sup>47</sup> (For  $\% \tau_2$ , we have used the new definition implemented in Turbomole starting from version 6.5.)

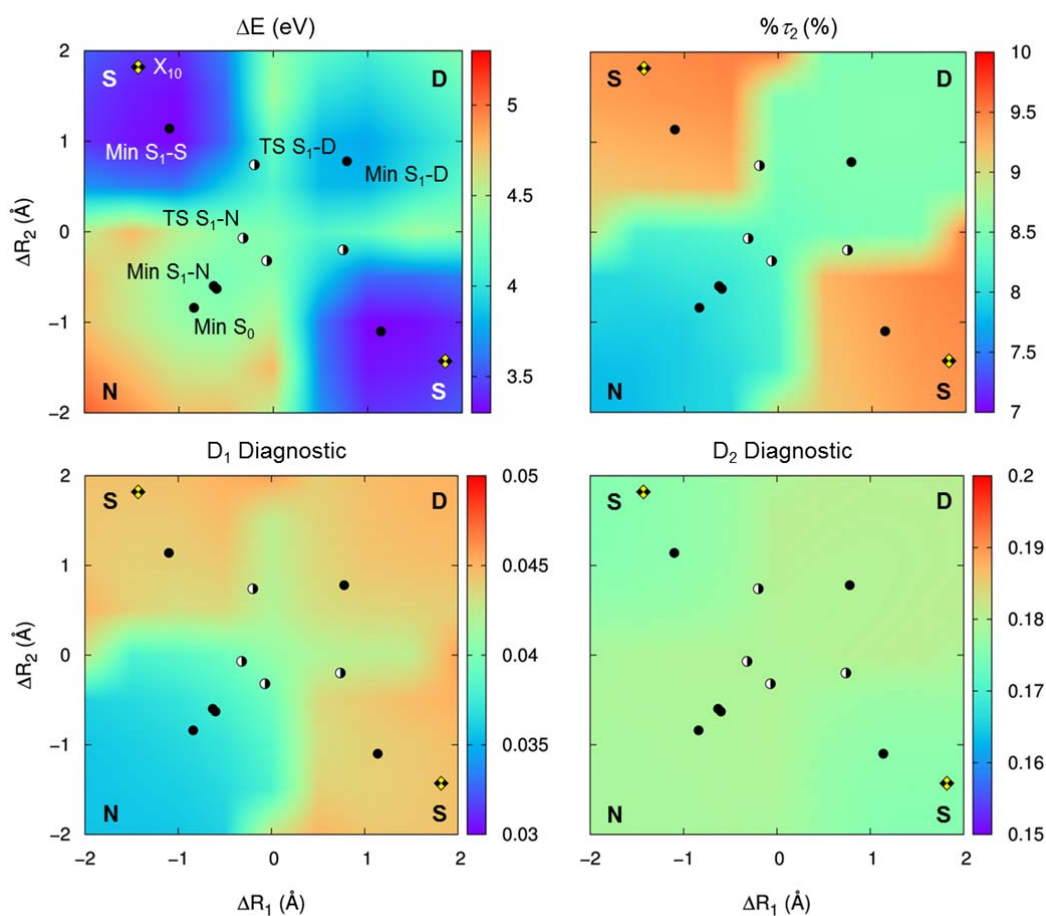

Fig. S11.  $\Delta E$ ,  $\% \tau_2$ ,  $D_1$  and  $D_2$  for ADC(2)/SV(P) on the  $\Delta R_1$ - $\Delta R_2$  plane. Stationary points and conical intersections are indicated as well.

$D_1$ ,  $D_2$  and  $\% \tau_2$  diagnostics were computed for all points on the (relaxed)  $\Delta R_1$ - $\Delta R_2$  plane.  $D_1$  and  $D_2$  were obtained at the MP2/SV(P) level (MP2 is the reference ground state for ADC(2)), while  $\% \tau_2$  was

computed at ADC(2)/SV(P) level for the  $S_1$  state. Because the three diagnostics were computed with the lowest computational level used in this work, the values discussed here should provide the upper limit for these quantities.

The  $D_1$  and  $D_2$  values are shown in Fig. S11.  $D_1$  is about 0.035 in the **N** region and increases to 0.045 in the **D** and **S** regions.  $D_2$  is about 0.18 in the whole plane. These values are within normal thresholds, indicating that multireference character does not pose a problem.

$\% \tau_2$  is 0.08 in the N and D regions and 0.095 in the S region. Such values are much smaller than the maximum recommended threshold, 0.15. Therefore, double excitations are also not a problem for the description of the  $S_1$  state of the current structures.

## SECTION S12. ADDITIONAL REFERENCES

1. A. Douhal, S. K. Kim and A. H. Zewail, *Nature*, 1995, **378**, 260-263.
2. R. Lopez-Martens, P. Long, D. Solgadi, B. Soep, J. Syage and P. Millie, *Chem. Phys. Lett.*, 1997, **273**, 219-226.
3. D. E. Folmer, L. Poth, E. S. Wisniewski and A. W. Castleman Jr, *Chem. Phys. Lett.*, 1998, **287**, 1-7.
4. D. E. Folmer, E. S. Wisniewski and A. W. Castleman Jr, *Chem. Phys. Lett.*, 2000, **318**, 637-643.
5. K. Sakota and H. Sekiya, *J. Phys. Chem. A*, 2005, **109**, 2722-2727.
6. K. Sakota, C. Okabe, N. Nishi and H. Sekiya, *J. Phys. Chem. A*, 2005, **109**, 5245-5247.
7. W. M. Hetherington III, R. H. Micheels and K. E. Eiseenthal, *Chem. Phys. Lett.*, 1979, **66**, 230-233.
8. P. Share, M. Pereira, M. Sarisky, S. Repinec and R. M. Hochstrasser, *J. Lumin.*, 1991, **48-49**, 204-208.
9. S. Abrash, S. Repinec and R. M. Hochstrasser, *J. Chem. Phys.*, 1990, **93**, 1041-1053.
10. S. Takeuchi and T. Tahara, *Chem. Phys. Lett.*, 1997, **277**, 340-346.
11. S. Takeuchi and T. Tahara, *J. Phys. Chem. A*, 1998, **102**, 7740-7753.
12. M. Chachisvilis, T. Fiebig, A. Douhal and A. H. Zewail, *J. Phys. Chem. A*, 1998, **102**, 669-673.
13. T. Fiebig, M. Chachisvilis, M. Manger, A. H. Zewail, A. Douhal, I. Garcia-Ochoa and A. de La Hoz Ayuso, *J. Phys. Chem. A*, 1999, **103**, 7419-7431.
14. D. E. Folmer, E. S. Wisniewski, S. M. Hurley and A. W. Castleman, Jr., *Proc. Natl. Acad. Sci. USA*, 1999, **96**, 12980-12986.
15. S. Takeuchi and T. Tahara, *Proc. Natl. Acad. Sci. USA*, 2007, **104**, 5285-5290.
16. O.-H. Kwon and A. H. Zewail, *Proc. Natl. Acad. Sci. USA*, 2007, **104**, 8703-8708.
17. O. Christiansen, H. Koch and P. Jorgensen, *Chem. Phys. Lett.*, 1995, **243**, 409-418.
18. C. Hättig and F. Weigend, *J. Chem. Phys.*, 2000, **113**, 5154-5161.
19. C. Hättig and A. Köhn, *J. Chem. Phys.*, 2002, **117**, 6939-6951.
20. J. Schirmer, *Phys. Rev. A*, 1982, **26**, 2395-2416.
21. A. B. Trofimov and J. Schirmer, *J. Phys. B: At., Mol. Opt. Phys.*, 1995, **28**, 2299-2324.
22. A. Schäfer, C. Huber and R. Ahlrichs, *J. Chem. Phys.*, 1994, **100**, 5829-5835.
23. H. Iikura, T. Tsuneda, T. Yanai and K. Hirao, *J. Chem. Phys.*, 2001, **115**, 3540-3544.
24. A. D. Becke, *J. Chem. Phys.*, 1988, **88**, 2547-2553.
25. C. Lee, W. Yang and R. G. Parr, *Phys. Rev. B*, 1988, **37**, 785-789.
26. B. G. Levine, J. D. Coe and T. J. Martínez, *J. Phys. Chem. B*, 2008, **112**, 405-413.
27. R. Crespo-Otero and M. Barbatti, *Theor. Chem. Acc.*, 2012, **131**, 1237.
28. M. Barbatti, *WIREs: Comp. Mol. Sci.*, 2011, **1**, 620-633.
29. J. C. Tully, *J. Chem. Phys.*, 1990, **93**, 1061-1071.
30. G. Granucci and M. Persico, *J. Chem. Phys.*, 2007, **126**, 134114-134111.
31. F. Plasser, R. Crespo-Otero, M. Pederzoli, J. Pittner, H. Lischka and M. Barbatti, *J. Chem. Theory Comput.*, 2014, **10**, 1395-1405.
32. S. Hammes-Schiffer and J. C. Tully, *J. Chem. Phys.*, 1994, **101**, 4657-4667.
33. J. Zheng, R. Meana-Pañeda and D. G. Truhlar, *J. Phys. Chem. Lett.*, 2014, **5**, 2039-2043.
34. R. Ahlrichs, M. Bär, M. Häser, H. Horn and C. Kölmel, *Chem. Phys. Lett.*, 1989, **162**, 165-169.
35. M. Barbatti, G. Granucci, M. Ruckebauer, F. Plasser, R. Crespo-Otero, J. Pittner, M. Persico and H. Lischka, *NEWTON-X: a package for Newtonian dynamics close to the crossing seam*, 2013, [www.newtonx.org](http://www.newtonx.org).
36. M. Barbatti, M. Ruckebauer, F. Plasser, J. Pittner, G. Granucci, M. Persico and H. Lischka, *WIREs: Comp. Mol. Sci.*, 2014, **4**, 26-33.
37. M. J. Frisch, G. W. Trucks, H. B. Schlegel, G. E. Scuseria, M. A. Robb, J. R. Cheeseman, G. Scalmani, V. Barone, B. Mennucci, G. A. Petersson, H. Nakatsuji, M. Caricato, X. Li, H. P. Hratchian, A. F. Izmaylov, J. Bloino, G. Zheng, J. L. Sonnenberg, M. Hada, M. Ehara, K. Toyota, R. Fukuda, J. Hasegawa, M. Ishida, T. Nakajima, Y. Honda, O. Kitao, H. Nakai, T. Vreven, J. Montgomery, J. A., J. E. Peralta, F. Ogliaro, M. Bearpark, J. J. Heyd, E. Brothers, K. N. Kudin, V. N. Staroverov, R. Kobayashi, J. Normand, K. Raghavachari, A. Rendell, J. C. Burant, S. S. Iyengar, J. Tomasi, M. Cossi, N. Rega, N. J. Millam, M. Klene, J. E. Knox, J. B. Cross, V. Bakken, C. Adamo, J. Jaramillo, R. Gomperts, R. E. Stratmann, O. Yazyev, A. J. Austin, R. Cammi, C. Pomelli, J. W. Ochterski, R. L. Martin, K. Morokuma, V. G. Zakrzewski, G. A. Voth, P. Salvador, J. J. Dannenberg, S. Dapprich, A. D. Daniels, Ö. Farkas, J. B. Foresman, J. V. Ortiz, J. Cioslowski and D. J. Fox, *Gaussian 09, Revision D.01. Gaussian, Inc., Wallingford CT*, 2013.

38. L. Serrano-Andrés and M. Merchán, *Chem. Phys. Lett.*, 2006, **418**, 569-575.
39. K. Ando, S. Hayashi and S. Kato, *Phys. Chem. Chem. Phys.*, 2011, **13**, 11118-11127.
40. X.-f. Yu, S. Yamazaki and T. Taketsugu, *J. Chem. Theory Comput.*, 2011, **7**, 1006-1015.
41. M. Moreno, A. Douhal, J. M. Lluch, O. Castaño and L. M. Frutos, *J. Phys. Chem. A*, 2001, **105**, 3887-3893.
42. Y. Tawada, T. Tsuneda, S. Yanagisawa, T. Yanai and K. Hirao, *J. Chem. Phys.*, 2004, **120**, 8425-8433.
43. M. S. Gordon and M. W. Schmidt, in *Theory and Applications of Computational Chemistry the first forty years*, eds. C. E. Dykstra, G. Frenking, K. S. Kim and G. E. Scuseria, Elsevier, Amsterdam, 2005, pp. 1167-1189.
44. T. Minami, M. Nakano and F. Castet, *J. Phys. Chem. Lett.*, 2011, **2**, 1725-1730.
45. C. L. Janssen and I. M. B. Nielsen, *Chem. Phys. Lett.*, 1998, **290**, 423-430.
46. I. M. B. Nielsen and C. L. Janssen, *Chem. Phys. Lett.*, 1999, **310**, 568-576.
47. C. Hättig, A. Köhn and K. Hald, *J. Chem. Phys.*, 2002, **116**, 5401-5410.

## SECTION S13.      CARTESIAN COORDINATES

Cartesian coordinates of all species reported in this work in Å.

|                     |           |           |           |          |           |           |           |
|---------------------|-----------|-----------|-----------|----------|-----------|-----------|-----------|
| <u>ADC(2)/SV(P)</u> |           |           |           | C        | 1.217330  | -0.013210 | 2.060566  |
| 30                  |           |           |           | C        | 2.467834  | -0.011647 | 1.340616  |
| Min S0              |           |           |           | C        | 2.332129  | 0.017015  | -0.067611 |
| N                   | -0.072922 | 0.000000  | -0.016406 | C        | 1.095267  | 0.039060  | -0.704114 |
| C                   | 0.028306  | -0.000000 | 1.320277  | C        | 0.824464  | -0.035856 | 3.468637  |
| C                   | 1.246744  | 0.000000  | 2.072563  | C        | -0.598057 | -0.021370 | 3.504463  |
| C                   | 2.446810  | -0.000000 | 1.336879  | N        | -1.098256 | 0.006917  | 2.263494  |
| C                   | 2.351535  | 0.000000  | -0.053933 | N        | -3.747716 | 0.024574  | 1.129864  |
| C                   | 1.087102  | -0.000000 | -0.683022 | C        | -4.871917 | 0.032149  | 1.872534  |
| C                   | 0.873023  | -0.000000 | 3.449865  | C        | -6.130341 | 0.018096  | 1.261541  |
| C                   | -0.514665 | -0.000000 | 3.474512  | C        | -6.247006 | -0.005982 | -0.135409 |
| N                   | -1.017713 | 0.000000  | 2.199948  | C        | -5.078940 | -0.013673 | -0.911524 |
| N                   | -3.762906 | -0.000000 | 1.199494  | C        | -3.799095 | 0.004215  | -0.225609 |
| C                   | -4.922764 | 0.000000  | 1.866384  | C        | -4.730478 | -0.035380 | -2.283533 |
| C                   | -6.187330 | -0.000000 | 1.237577  | C        | -3.329539 | -0.028395 | -2.303755 |
| C                   | -6.282899 | 0.000000  | -0.153217 | N        | -2.755335 | -0.004500 | -1.059070 |
| C                   | -5.082994 | -0.000000 | -0.889172 | H        | -2.801519 | 0.028113  | 1.594298  |
| C                   | -3.864396 | 0.000000  | -0.137159 | H        | -1.034093 | 0.027744  | -0.441856 |
| C                   | -4.709566 | 0.000000  | -2.266554 | H        | 3.441726  | -0.029779 | 1.841708  |
| C                   | -3.321882 | 0.000000  | -2.291507 | H        | 3.226112  | 0.021032  | -0.703241 |
| N                   | -2.818550 | -0.000000 | -1.017046 | H        | 0.985356  | 0.061175  | -1.793254 |
| H                   | -2.023749 | -0.000000 | 1.924197  | H        | -7.238653 | -0.018825 | -0.605267 |
| H                   | -1.812480 | 0.000000  | -0.741479 | H        | -7.020979 | 0.025188  | 1.897822  |
| H                   | 3.423180  | 0.000000  | 1.837266  | H        | -4.735379 | 0.048989  | 2.958592  |
| H                   | 3.254030  | -0.000000 | -0.675078 | H        | 1.495366  | -0.060149 | 4.332997  |
| H                   | 1.017991  | 0.000000  | -1.779252 | H        | -1.245329 | -0.031107 | 4.386305  |
| H                   | -7.259382 | -0.000000 | -0.653382 | H        | -2.689633 | -0.039983 | -3.193090 |
| H                   | -7.089685 | 0.000000  | 1.858924  | H        | -5.400678 | -0.053607 | -3.145169 |
| H                   | -4.853380 | -0.000000 | 2.962598  | 30       |           |           |           |
| H                   | 1.531898  | 0.000000  | 4.320080  | Min S1-S |           |           |           |
| H                   | -1.189307 | 0.000000  | 4.334190  | N        | 0.049040  | 0.006402  | 0.058329  |
| H                   | -2.647444 | -0.000000 | -3.151343 | C        | 0.172676  | -0.015025 | 1.373956  |
| H                   | -5.368636 | -0.000000 | -3.136623 | C        | 1.404519  | -0.019214 | 2.085462  |
| 30                  |           |           |           | C        | 2.601403  | -0.003245 | 1.354553  |
| Min S1-N            |           |           |           | C        | 2.481378  | 0.017843  | -0.039454 |
| N                   | -0.167912 | 0.032907  | -0.048484 | C        | 1.207490  | 0.022852  | -0.636869 |
| C                   | 0.002014  | 0.008862  | 1.282896  | C        | 1.030597  | -0.037815 | 3.463199  |
| C                   | 1.178288  | -0.012671 | 2.033416  | C        | -0.409999 | -0.045857 | 3.476053  |
| C                   | 2.437192  | -0.011755 | 1.343128  | N        | -0.926696 | -0.034630 | 2.265621  |
| C                   | 2.303354  | 0.016362  | -0.075475 | N        | -3.901148 | 0.116408  | 1.184999  |
| C                   | 1.066923  | 0.036839  | -0.710018 | C        | -5.112876 | 0.054395  | 1.881911  |
| C                   | 0.763732  | -0.032070 | 3.417379  | C        | -6.323386 | 0.013898  | 1.197107  |
| C                   | -0.670199 | -0.020215 | 3.460122  | C        | -6.411382 | -0.016584 | -0.207695 |
| N                   | -1.098298 | 0.004261  | 2.197744  | C        | -5.152476 | -0.008144 | -0.925937 |
| N                   | -3.676365 | 0.026028  | 1.205578  | C        | -3.959686 | 0.028601  | -0.190138 |
| C                   | -4.827696 | 0.032037  | 1.891674  | C        | -4.756840 | -0.042162 | -2.295564 |
| C                   | -6.096953 | 0.017002  | 1.279458  | C        | -3.366284 | -0.017172 | -2.338334 |
| C                   | -6.209336 | -0.006514 | -0.111820 | N        | -2.890897 | 0.033161  | -1.040414 |
| C                   | -5.022140 | -0.012681 | -0.865521 | H        | -3.001626 | 0.017511  | 1.663213  |
| C                   | -3.787674 | 0.005481  | -0.133551 | H        | -1.908471 | 0.039213  | -0.751850 |
| C                   | -4.665652 | -0.032667 | -2.245709 | H        | 3.582786  | -0.006892 | 1.843900  |
| C                   | -3.276097 | -0.025370 | -2.283534 | H        | 3.370743  | 0.031502  | -0.677005 |
| N                   | -2.753765 | -0.002757 | -1.019209 | H        | 1.112078  | 0.040881  | -1.728602 |
| H                   | -2.130200 | 0.017933  | 1.864024  | H        | -7.376950 | -0.051923 | -0.727617 |
| H                   | -1.719682 | 0.011580  | -0.736662 | H        | -7.239640 | -0.002771 | 1.803244  |
| H                   | 3.404702  | -0.028303 | 1.855758  | H        | -5.038486 | 0.092448  | 2.974409  |
| H                   | 3.202149  | 0.022139  | -0.705838 | H        | 1.689779  | -0.043761 | 4.336950  |
| H                   | 1.007018  | 0.059481  | -1.806422 | H        | -1.044426 | -0.059891 | 4.368715  |
| H                   | -7.193444 | -0.019285 | -0.596553 | H        | -2.680152 | -0.037934 | -3.187089 |
| H                   | -6.991161 | 0.023610  | 1.912303  | H        | -5.414961 | -0.080623 | -3.167668 |
| H                   | -4.742659 | 0.049889  | 2.986795  | 30       |           |           |           |
| H                   | 1.412918  | -0.052385 | 4.297782  | TS S1-N  |           |           |           |
| H                   | -1.347442 | -0.028871 | 4.316479  | N        | -0.235970 | 0.046128  | -0.074138 |
| H                   | -2.611709 | -0.035189 | -3.151381 | C        | -0.083797 | 0.002127  | 1.268079  |
| H                   | -5.333845 | -0.049632 | -3.108657 | C        | 1.096087  | -0.036043 | 2.002684  |
| 30                  |           |           |           | C        | 2.355743  | -0.034151 | 1.314095  |
| Min S1-D            |           |           |           | C        | 2.226908  | 0.015572  | -0.103681 |
| N                   | -0.093486 | 0.040007  | 0.024433  | C        | 0.992747  | 0.051990  | -0.741738 |
| C                   | 0.019255  | 0.009187  | 1.384843  | C        | 0.678782  | -0.074300 | 3.393386  |



|         |           |           |           |
|---------|-----------|-----------|-----------|
| C       | -0.748484 | -0.053603 | 3.424576  |
| N       | -1.196126 | -0.007380 | 2.165363  |
| N       | -3.606199 | 0.022582  | 1.208326  |
| C       | -4.740572 | 0.024955  | 1.925487  |
| C       | -6.011128 | 0.002627  | 1.324751  |
| C       | -6.137618 | -0.025861 | -0.067413 |
| C       | -4.964158 | -0.028155 | -0.840691 |
| C       | -3.711715 | -0.000623 | -0.134181 |
| C       | -4.621359 | -0.051670 | -2.221571 |
| C       | -3.228930 | -0.036573 | -2.267919 |
| N       | -2.682891 | -0.005986 | -1.013583 |
| H       | -2.386154 | 0.016285  | 1.750424  |
| H       | -1.573047 | 0.019165  | -0.688041 |
| H       | 3.322452  | -0.061888 | 1.828452  |
| H       | 3.127856  | 0.024984  | -0.730886 |
| H       | 0.930407  | 0.090754  | -1.837510 |
| H       | -7.128799 | -0.046059 | -0.537360 |
| H       | -6.899264 | 0.006142  | 1.965522  |
| H       | -4.626240 | 0.044795  | 3.016720  |
| H       | 1.330483  | -0.113426 | 4.271805  |
| H       | -1.419596 | -0.071473 | 4.286790  |
| H       | -2.578533 | -0.046050 | -3.146920 |
| H       | -5.297856 | -0.076436 | -3.077887 |
| 30      |           |           |           |
| TS S1-D |           |           |           |
| N       | -0.085678 | 0.015968  | -0.082933 |
| C       | -0.045134 | 0.003147  | 1.280069  |
| C       | 1.110788  | -0.020709 | 2.042719  |
| C       | 2.396981  | -0.037059 | 1.385888  |
| C       | 2.341841  | -0.026815 | -0.028011 |
| C       | 1.147043  | -0.001858 | -0.740396 |
| C       | 0.646274  | -0.022636 | 3.414934  |
| C       | -0.769618 | -0.000400 | 3.389026  |
| N       | -1.180741 | 0.015943  | 2.105166  |
| N       | -3.594190 | 0.003872  | 1.137754  |
| C       | -4.700478 | -0.027474 | 1.904693  |
| C       | -5.996083 | -0.053165 | 1.363261  |
| C       | -6.182254 | -0.048144 | -0.025081 |
| C       | -5.041056 | -0.016018 | -0.841384 |
| C       | -3.749836 | 0.009061  | -0.197586 |
| C       | -4.749153 | 0.000249  | -2.232072 |
| C       | -3.344582 | 0.032259  | -2.314665 |
| N       | -2.732941 | 0.038133  | -1.103506 |
| H       | -2.303272 | 0.018703  | 1.685395  |
| H       | -1.012401 | 0.029958  | -0.586424 |
| H       | 3.342871  | -0.057716 | 1.938490  |
| H       | 3.272833  | -0.039010 | -0.608696 |
| H       | 1.102110  | 0.006502  | -1.834458 |
| H       | -7.192902 | -0.069365 | -0.452731 |
| H       | -6.855459 | -0.077812 | 2.041952  |
| H       | -4.540674 | -0.032227 | 2.990938  |
| H       | 1.266263  | -0.037427 | 4.316325  |
| H       | -1.478918 | 0.004702  | 4.220309  |
| H       | -2.745990 | 0.052100  | -3.232331 |
| H       | -5.455412 | -0.009134 | -3.066114 |
| 30      |           |           |           |
| X10     |           |           |           |
| N       | 0.252330  | -0.235250 | 0.093433  |
| C       | 0.399265  | -0.023746 | 1.381457  |
| C       | 1.622218  | 0.216116  | 2.048215  |
| C       | 2.802768  | 0.270048  | 1.300388  |
| C       | 2.667125  | 0.048225  | -0.077184 |
| C       | 1.398871  | -0.204032 | -0.626784 |
| C       | 1.262853  | 0.351268  | 3.429281  |
| C       | -0.185290 | 0.190555  | 3.480421  |
| N       | -0.699517 | -0.017075 | 2.305258  |
| N       | -4.249739 | -0.551657 | 1.233688  |
| C       | -5.548831 | -0.389857 | 1.811309  |
| C       | -6.674293 | -0.146900 | 1.037237  |
| C       | -6.633620 | 0.086509  | -0.351042 |
| C       | -5.292794 | 0.073152  | -0.934944 |
| C       | -4.197240 | -0.166642 | -0.120899 |
| C       | -4.773373 | 0.262828  | -2.249919 |
| C       | -3.392102 | 0.115082  | -2.189824 |
| N       | -3.048555 | -0.164308 | -0.883359 |
| H       | -3.482635 | -0.200718 | 1.804133  |
| H       | -2.105486 | -0.307171 | -0.537911 |

|                    |           |           |           |
|--------------------|-----------|-----------|-----------|
| H                  | 3.778926  | 0.474652  | 1.755421  |
| H                  | 3.539347  | 0.068519  | -0.735819 |
| H                  | 1.291907  | -0.390732 | -1.701037 |
| H                  | -7.528836 | 0.311899  | -0.942105 |
| H                  | -7.639775 | -0.126123 | 1.564140  |
| H                  | -5.604938 | -0.616455 | 2.883428  |
| H                  | 1.926763  | 0.541903  | 4.278352  |
| H                  | -0.797680 | 0.243719  | 4.385861  |
| H                  | -2.632224 | 0.213557  | -2.965829 |
| H                  | -5.346715 | 0.482744  | -3.155145 |
| <b>ADC(2)/TZVP</b> |           |           |           |
| 30                 |           |           |           |
| Min S0             |           |           |           |
| N                  | -0.093929 | 0.046863  | -0.010231 |
| C                  | 0.021030  | 0.051031  | 1.324198  |
| C                  | 1.232977  | -0.042222 | 2.068951  |
| C                  | 2.424477  | 0.012320  | 1.335580  |
| C                  | 2.327685  | -0.010568 | -0.047550 |
| C                  | 1.070294  | 0.022987  | -0.671186 |
| C                  | 0.866691  | -0.010442 | 3.443489  |
| C                  | -0.511529 | 0.017166  | 3.477084  |
| N                  | -1.022073 | 0.082548  | 2.206159  |
| N                  | -3.742400 | -0.046891 | 1.193618  |
| C                  | -4.906606 | -0.022963 | 1.854532  |
| C                  | -6.163899 | 0.010714  | 1.230712  |
| C                  | -6.260649 | -0.012253 | -0.152445 |
| C                  | -5.069082 | 0.042166  | -0.885723 |
| C                  | -3.857208 | -0.051023 | -0.140842 |
| C                  | -4.702708 | 0.010579  | -2.260242 |
| C                  | -3.324472 | -0.017488 | -2.293664 |
| N                  | -2.813957 | -0.082465 | -1.022710 |
| H                  | -2.017714 | 0.030729  | 1.936128  |
| H                  | -1.818259 | -0.030676 | -0.752641 |
| H                  | 3.390397  | -0.012025 | 1.826440  |
| H                  | 3.215846  | 0.005637  | 0.865722  |
| H                  | 1.000616  | 0.008550  | -1.753320 |
| H                  | -7.226573 | 0.012176  | -0.643304 |
| H                  | -7.052041 | -0.005528 | 1.848861  |
| H                  | -4.836894 | -0.008775 | 2.936729  |
| H                  | 1.519648  | -0.062378 | 4.299232  |
| H                  | -1.174235 | 0.039071  | 4.327822  |
| H                  | -2.661758 | -0.039023 | -3.144391 |
| H                  | -5.355689 | 0.062180  | -3.115989 |
| 30                 |           |           |           |
| Min S1-N           |           |           |           |
| N                  | -0.173823 | 0.024340  | -0.056565 |
| C                  | 0.002940  | -0.015430 | 1.275743  |
| C                  | 1.167561  | 0.041497  | 2.025310  |
| C                  | 2.424562  | -0.055442 | 1.347285  |
| C                  | 2.299629  | 0.015168  | -0.064472 |
| C                  | 1.073402  | 0.030792  | -0.702304 |
| C                  | 0.753498  | -0.043526 | 3.400758  |
| C                  | -0.672164 | -0.008018 | 3.445280  |
| N                  | -1.104225 | 0.008294  | 2.187388  |
| N                  | -3.665299 | 0.022628  | 1.207965  |
| C                  | -4.822816 | 0.025157  | 1.886375  |
| C                  | -6.083771 | 0.008749  | 1.276176  |
| C                  | -6.194418 | 0.021072  | -0.108103 |
| C                  | -5.014931 | -0.057021 | -0.855715 |
| C                  | -3.786820 | 0.030321  | -0.129648 |
| C                  | -4.663741 | -0.039611 | -2.232378 |
| C                  | -3.283199 | -0.030693 | -2.276907 |
| N                  | -2.754119 | 0.024744  | -1.015709 |
| H                  | -2.128030 | 0.022953  | 1.862119  |
| H                  | -1.730112 | 0.016407  | -0.744195 |
| H                  | 3.374902  | 0.007323  | 1.859551  |
| H                  | 3.187981  | 0.011296  | -0.686029 |
| H                  | 1.023322  | 0.080396  | -1.784134 |
| H                  | -7.166913 | 0.008214  | -0.586395 |
| H                  | -6.965318 | 0.045042  | 1.902690  |
| H                  | -4.740117 | 0.015840  | 2.967779  |
| H                  | 1.394900  | -0.079015 | 4.269816  |
| H                  | -1.341520 | -0.024078 | 4.289690  |
| H                  | -2.629256 | -0.021674 | -3.134902 |
| H                  | -5.326030 | -0.091680 | -3.080771 |
| 30                 |           |           |           |

Min S1-D  
 N -0.105163 0.344305 0.037242  
 C 0.010025 0.099873 1.377937  
 C 1.198182 -0.013625 2.041366  
 C 2.433408 -0.120120 1.311613  
 C 2.301703 0.048997 -0.078119  
 C 1.076440 0.215160 -0.699728  
 C 0.807156 -0.184650 3.433592  
 C -0.599416 -0.046321 3.489393  
 N -1.110175 0.130257 2.265081  
 N -3.746593 0.068514 1.148298  
 C -4.881308 0.117801 1.871476  
 C -6.122943 0.058270 1.248296  
 C -6.220444 -0.008613 -0.142084  
 C -5.050172 -0.119441 -0.893460  
 C -3.785295 0.022321 -0.204957  
 C -4.689854 -0.178118 -2.256092  
 C -3.297319 -0.155339 -2.266438  
 N -2.728892 -0.033059 -1.020946  
 H -2.815833 0.121834 1.616805  
 H -1.028198 0.208592 -0.424804  
 H 3.394346 -0.206112 1.800167  
 H 3.174126 -0.011947 -0.717648  
 H 0.972266 0.333035 -1.769075  
 H -7.194683 -0.058848 -0.615044  
 H -7.008896 0.122658 1.864525  
 H -4.759876 0.169462 2.944265  
 H 1.468876 -0.349296 4.272990  
 H -1.233859 -0.104343 4.361133  
 H -2.656884 -0.191809 -3.137154  
 H -5.342316 -0.279438 -3.108420

30

Min S1-S  
 N 0.035375 0.298707 0.055577  
 C 0.153971 0.035106 1.343138  
 C 1.367229 -0.199570 2.033784  
 C 2.566731 0.003482 1.349302  
 C 2.467063 0.267213 -0.013437  
 C 1.209365 0.416268 -0.606524  
 C 0.980299 -0.411502 3.384975  
 C -0.453055 -0.394815 3.387949  
 N -0.963402 -0.130005 2.204066  
 N -3.877418 0.500867 1.148235  
 C -5.094261 0.445651 1.850886  
 C -6.292020 0.241267 1.189916  
 C -6.370927 -0.074107 -0.172132  
 C -5.120284 -0.086402 -0.889899  
 C -3.939745 0.082596 -0.171171  
 C -4.721195 -0.404118 -2.217141  
 C -3.341223 -0.334317 -2.272343  
 N -2.866042 -0.052702 -1.004906  
 H -3.018906 0.286272 1.650472  
 H -1.901419 0.133758 -0.749053  
 H 3.530489 -0.114835 1.830247  
 H 3.352123 0.409785 -0.618221  
 H 1.129868 0.627526 -1.665282  
 H -7.321667 -0.202848 -0.674471  
 H -7.192958 0.269321 1.793999  
 H -5.035084 0.699604 2.900534  
 H 1.620755 -0.606320 4.234734  
 H -1.089455 -0.553589 4.248035  
 H -2.659800 -0.537221 -3.081489  
 H -5.368285 -0.623598 -3.052398

30

TS S1-N  
 N -0.245693 0.308283 -0.065501  
 C -0.091329 0.069480 1.258535  
 C 1.076996 -0.054184 1.985091  
 C 2.324011 -0.158452 1.291870  
 C 2.209813 0.082562 -0.101128  
 C 0.991370 0.269786 -0.726168  
 C 0.653973 -0.256616 3.354089  
 C -0.757011 -0.117308 3.401755  
 N -1.207788 0.080347 2.159073  
 N -3.595936 0.130472 1.216088  
 C -4.737968 0.165976 1.920472  
 C -5.995333 0.074339 1.318430

C -6.111838 -0.029586 -0.064062  
 C -4.939814 -0.137324 -0.818258  
 C -3.701056 0.038046 -0.121765  
 C -4.594064 -0.227458 -2.191191  
 C -3.211102 -0.191614 -2.239504  
 N -2.668055 -0.033850 -0.992245  
 H -2.397999 0.145047 1.751513  
 H -1.591526 0.103333 -0.691222  
 H 3.275761 -0.233642 1.800153  
 H 3.096656 0.075685 -0.725177  
 H 0.944693 0.453845 -1.793606  
 H -7.087920 -0.108143 -0.528465  
 H -6.875156 0.137561 1.944481  
 H -4.631060 0.245211 2.995707  
 H 1.293132 -0.438304 4.207169  
 H -1.420731 -0.195053 4.248564  
 H -2.564237 -0.238514 -3.102209  
 H -5.257762 -0.361494 -3.029549

30

TS S1-D  
 N -0.096073 0.390878 -0.068778  
 C -0.091693 0.102799 1.267778  
 C 1.028998 -0.192184 2.008706  
 C 2.310107 -0.270469 1.359225  
 C 2.265624 -0.160077 -0.043342  
 C 1.104290 0.120901 -0.739201  
 C 0.580831 -0.176168 3.380798  
 C -0.792379 0.122150 3.379029  
 N -1.198971 0.329214 2.109394  
 N -3.571438 0.289139 1.141552  
 C -4.664779 0.102588 1.908372  
 C -5.922614 -0.174655 1.373330  
 C -6.095780 -0.270436 -0.007587  
 C -4.962086 -0.179699 -0.815701  
 C -3.722599 0.190215 -0.189404  
 C -4.675337 -0.177112 -2.203278  
 C -3.308202 0.097858 -2.298642  
 N -2.717013 0.340437 -1.096731  
 H -2.319680 0.392637 1.690927  
 H -1.011022 0.385891 -0.574776  
 H 3.214407 -0.541344 1.887573  
 H 3.170043 -0.294460 -0.625141  
 H 1.072140 0.233189 -1.813784  
 H -7.072249 -0.493017 -0.423245  
 H -6.766031 -0.265436 2.044930  
 H -4.511960 0.171656 2.979331  
 H 1.182253 -0.367236 4.258100  
 H -1.483512 0.168092 4.205946  
 H -2.725127 0.170274 -3.206811  
 H -5.349894 -0.391995 -3.018042

30

X10  
 N 0.244182 -0.221822 0.096144  
 C 0.404022 -0.007240 1.381134  
 C 1.628688 0.159274 2.054493  
 C 2.792484 0.276121 1.299423  
 C 2.661962 0.037809 -0.067225  
 C 1.398425 -0.193525 -0.615063  
 C 1.267414 0.366266 3.418718  
 C -0.168433 0.193433 3.477575  
 N -0.696063 -0.016550 2.307043  
 N -4.252936 -0.565846 1.225458  
 C -5.550795 -0.389611 1.802850  
 C -6.667413 -0.149720 1.030108  
 C -6.618164 0.134436 -0.341308  
 C -5.293497 0.048237 -0.937357  
 C -4.201106 -0.156965 -0.121872  
 C -4.773845 0.266400 -2.243034  
 C -3.401807 0.105063 -2.188840  
 N -3.052595 -0.166085 -0.882441  
 H -3.499932 -0.197724 1.791965  
 H -2.115387 -0.306228 -0.541194  
 H 3.758911 0.464287 1.750775  
 H 3.521085 0.074549 -0.722039  
 H 1.296768 -0.386301 -1.674516  
 H -7.508913 0.283904 -0.936011  
 H -7.617792 -0.121194 1.555328

|                 |           |           |           |          |           |           |           |
|-----------------|-----------|-----------|-----------|----------|-----------|-----------|-----------|
| H               | -5.608143 | -0.620773 | 2.857989  | C        | 1.079238  | 0.215280  | -0.705289 |
| H               | 1.925067  | 0.555429  | 4.257804  | C        | 0.808518  | -0.186138 | 3.439011  |
| H               | -0.773088 | 0.243478  | 4.371335  | C        | -0.600150 | -0.046574 | 3.494164  |
| H               | -2.650237 | 0.222527  | -2.949526 | N        | -1.115063 | 0.131142  | 2.265671  |
| H               | -5.340104 | 0.478480  | -3.137485 | N        | -3.743574 | 0.067934  | 1.151421  |
| <b>CC2/TZVP</b> |           |           |           |          |           |           |           |
| 30              |           |           |           |          |           |           |           |
| Min S0          |           |           |           |          |           |           |           |
| N               | -0.097933 | 0.047204  | -0.013832 | C        | -5.052019 | -0.120662 | -0.894068 |
| C               | 0.019661  | 0.050446  | 1.323434  | C        | -3.784923 | 0.021117  | -0.205113 |
| C               | 1.234281  | -0.044093 | 2.070068  | C        | -4.688628 | -0.177751 | -2.261640 |
| C               | 2.425038  | 0.011485  | 1.336487  | C        | -3.297065 | -0.155593 | -2.273600 |
| C               | 2.330231  | -0.010777 | -0.052238 | N        | -2.724343 | -0.033258 | -1.021158 |
| C               | 1.073211  | 0.022816  | -0.675281 | H        | -2.810116 | 0.122816  | 1.620586  |
| C               | 0.866418  | -0.010661 | 3.447688  | H        | -1.033115 | 0.206468  | -0.426113 |
| C               | -0.511965 | 0.017969  | 3.482494  | H        | 3.394989  | -0.205870 | 1.801094  |
| N               | -1.025915 | 0.084235  | 2.205891  | H        | 3.177889  | -0.013021 | -0.718901 |
| N               | -3.738290 | -0.047235 | 1.197196  | H        | 0.973225  | 0.334084  | -1.774642 |
| C               | -4.909477 | -0.022845 | 1.858568  | H        | -7.197157 | -0.058367 | -0.615727 |
| C               | -6.166459 | 0.010855  | 1.235452  | H        | -7.014160 | 0.123605  | 1.867618  |
| C               | -6.261183 | -0.011394 | -0.153277 | H        | -4.761282 | 0.169555  | 2.949384  |
| C               | -5.070382 | 0.044106  | -0.886786 | H        | 1.472414  | -0.350657 | 4.278138  |
| C               | -3.855804 | -0.050409 | -0.140080 | H        | -1.237249 | -0.104541 | 4.364693  |
| C               | -4.702441 | 0.010599  | -2.264384 | H        | -2.653831 | -0.192164 | -3.143063 |
| C               | -3.324054 | -0.018011 | -2.299108 | H        | -5.343659 | -0.280086 | -3.113028 |
| N               | -2.810186 | -0.084238 | -1.022477 | 30       |           |           |           |
| H               | -2.024801 | 0.030568  | 1.933622  | Min S1-S |           |           |           |
| H               | -1.811308 | -0.030548 | -0.750151 | N        | 0.028932  | 0.298597  | 0.053472  |
| H               | 3.392123  | -0.011326 | 1.826953  | C        | 0.149552  | 0.032496  | 1.341642  |
| H               | 3.220094  | 0.006363  | -0.669056 | C        | 1.367212  | -0.201602 | 2.034959  |
| H               | 1.001940  | 0.009268  | -1.758093 | C        | 2.565573  | 0.002654  | 1.350461  |
| H               | -7.228235 | 0.011462  | -0.643803 | C        | 2.466466  | 0.268711  | -0.018086 |
| H               | -7.056363 | -0.006247 | 1.852210  | C        | 1.210478  | 0.417187  | -0.610730 |
| H               | -4.838283 | -0.009414 | 2.941385  | C        | 0.980821  | -0.412521 | 3.388441  |
| H               | 1.521702  | -0.062854 | 4.302678  | C        | -0.455123 | -0.395880 | 3.392162  |
| H               | -1.176474 | 0.039751  | 4.332625  | N        | -0.972823 | -0.132253 | 2.205261  |
| H               | -2.659489 | -0.039792 | -3.149192 | N        | -3.872246 | 0.513509  | 1.148389  |
| H               | -5.357672 | 0.062716  | -3.119416 | C        | -5.094500 | 0.448852  | 1.854163  |
| 30              |           |           |           |          |           |           |           |
| Min S1-N        |           |           |           |          |           |           |           |
| N               | -0.175497 | 0.025974  | -0.060930 | C        | -6.291488 | 0.240506  | 1.193770  |
| C               | 0.002200  | -0.017696 | 1.274901  | C        | -6.369962 | -0.073212 | -0.173390 |
| C               | 1.168840  | 0.040357  | 2.024515  | C        | -5.122428 | -0.084084 | -0.891149 |
| C               | 2.424619  | -0.054121 | 1.347758  | C        | -3.939457 | 0.085377  | -0.171408 |
| C               | 2.301733  | 0.015103  | -0.067299 | C        | -4.720263 | -0.406133 | -2.221140 |
| C               | 1.076928  | 0.030154  | -0.708212 | C        | -3.339726 | -0.336275 | -2.276806 |
| C               | 0.754895  | -0.044621 | 3.404924  | N        | -2.862393 | -0.054964 | -1.004791 |
| C               | -0.674217 | -0.008158 | 3.448764  | H        | -3.016554 | 0.276984  | 1.650997  |
| N               | -1.110917 | 0.009137  | 2.189441  | H        | -1.897858 | 0.141887  | -0.749163 |
| N               | -3.661232 | 0.022469  | 1.211120  | H        | 3.530690  | -0.113795 | 1.831252  |
| C               | -4.825089 | 0.025850  | 1.890705  | H        | 3.353763  | 0.410724  | -0.621152 |
| C               | -6.086038 | 0.008865  | 1.281524  | H        | 1.128756  | 0.629441  | -1.670111 |
| C               | -6.194594 | 0.020429  | -0.108190 | H        | -7.322255 | -0.201732 | -0.673845 |
| C               | -5.016027 | -0.058493 | -0.856588 | H        | -7.193578 | 0.263084  | 1.797286  |
| C               | -3.784791 | 0.030150  | -0.129450 | H        | -5.033380 | 0.702299  | 2.904359  |
| C               | -4.663480 | -0.039949 | -2.236622 | H        | 1.622998  | -0.606539 | 4.238854  |
| C               | -3.283117 | -0.030823 | -2.283002 | H        | -1.090726 | -0.554329 | 4.254189  |
| N               | -2.749811 | 0.026718  | -1.016041 | H        | -2.656016 | -0.542553 | -3.083998 |
| H               | -2.141714 | 0.024008  | 1.860735  | H        | -5.368342 | -0.624964 | -3.056508 |
| H               | -1.720989 | 0.015934  | -0.741624 | 30       |           |           |           |
| H               | 3.375014  | 0.008632  | 1.860196  | TS S1-N  |           |           |           |
| H               | 3.192329  | 0.010660  | -0.687120 | N        | -0.246666 | 0.346180  | -0.062519 |
| H               | 1.025879  | 0.080537  | -1.790208 | C        | -0.089157 | 0.085106  | 1.259864  |
| H               | -7.168181 | 0.007829  | -0.585828 | C        | 1.081959  | -0.060457 | 1.981607  |
| H               | -6.969304 | 0.045243  | 1.906926  | C        | 2.324045  | -0.166828 | 1.284371  |
| H               | -4.740328 | 0.016530  | 2.972517  | C        | 2.209433  | 0.088579  | -0.109237 |
| H               | 1.398526  | -0.079642 | 4.274013  | C        | 0.992622  | 0.296814  | -0.730927 |
| H               | -1.343590 | -0.024085 | 4.294282  | C        | 0.660756  | -0.281457 | 3.353322  |
| H               | -2.628020 | -0.021759 | -3.141023 | C        | -0.752802 | -0.129028 | 3.407077  |
| H               | -5.327951 | -0.091186 | -3.084486 | N        | -1.207957 | 0.094264  | 2.167609  |
| 30              |           |           |           |          |           |           |           |
| Min S1-D        |           |           |           |          |           |           |           |
| N               | -0.106912 | 0.349093  | 0.035130  | N        | -3.600926 | 0.147156  | 1.223107  |
| C               | 0.010161  | 0.100111  | 1.377125  | C        | -4.753338 | 0.186715  | 1.921903  |
| C               | 1.201470  | -0.014167 | 2.040976  | C        | -6.008071 | 0.083605  | 1.316848  |
| C               | 2.433351  | -0.119041 | 1.313256  | C        | -6.116587 | -0.037086 | -0.070468 |
| C               | 2.302854  | 0.048398  | -0.081837 | C        | -4.941582 | -0.149899 | -0.818415 |
|                 |           |           |           | C        | -3.703896 | 0.037098  | -0.116915 |
|                 |           |           |           | C        | -4.587738 | -0.249501 | -2.192997 |
|                 |           |           |           | C        | -3.205384 | -0.208804 | -2.237537 |
|                 |           |           |           | N        | -2.663792 | -0.039163 | -0.982919 |

|   |           |           |           |
|---|-----------|-----------|-----------|
| H | -2.389122 | 0.163670  | 1.766902  |
| H | -1.584296 | 0.119014  | -0.679842 |
| H | 3.276671  | -0.257388 | 1.788957  |
| H | 3.096359  | 0.076813  | -0.734247 |
| H | 0.942839  | 0.492815  | -1.796398 |
| H | -7.091543 | -0.122644 | -0.537932 |
| H | -6.892485 | 0.152146  | 1.936970  |
| H | -4.650878 | 0.279739  | 2.997292  |
| H | 1.302214  | -0.483472 | 4.201564  |
| H | -1.415572 | -0.211822 | 4.255063  |
| H | -2.552981 | -0.259495 | -3.096629 |
| H | -5.249098 | -0.394238 | -3.032535 |

30

TS S1-D

|   |           |           |           |
|---|-----------|-----------|-----------|
| N | -0.096583 | 0.438142  | -0.065024 |
| C | -0.094497 | 0.134737  | 1.271035  |
| C | 1.022602  | -0.196681 | 2.007024  |
| C | 2.295166  | -0.306148 | 1.353254  |
| C | 2.249874  | -0.190441 | -0.053261 |
| C | 1.095334  | 0.126699  | -0.744526 |
| C | 0.575221  | -0.188229 | 3.385250  |
| C | -0.791111 | 0.145134  | 3.389657  |
| N | -1.197646 | 0.383259  | 2.119182  |
| N | -3.569410 | 0.322804  | 1.143504  |
| C | -4.665313 | 0.109709  | 1.912106  |
| C | -5.914459 | -0.199010 | 1.378151  |
| C | -6.081769 | -0.308966 | -0.009451 |
| C | -4.950746 | -0.196810 | -0.815519 |
| C | -3.718644 | 0.208218  | -0.189065 |
| C | -4.661317 | -0.191866 | -2.208034 |
| C | -3.302010 | 0.117058  | -2.304777 |
| N | -2.713154 | 0.381792  | -1.098011 |
| H | -2.316581 | 0.446061  | 1.699880  |
| H | -1.016184 | 0.436784  | -0.568821 |
| H | 3.194583  | -0.603970 | 1.876008  |
| H | 3.149144  | -0.352367 | -0.637214 |
| H | 1.060068  | 0.243855  | -1.818889 |
| H | -7.053488 | -0.556772 | -0.424233 |
| H | -6.758662 | -0.306568 | 2.047463  |
| H | -4.513655 | 0.188853  | 2.983301  |
| H | 1.175334  | -0.405562 | 4.258510  |
| H | -1.481188 | 0.199100  | 4.217774  |
| H | -2.718675 | 0.200700  | -3.212579 |
| H | -5.331985 | -0.425890 | -3.022166 |

30

X10

|   |           |           |           |
|---|-----------|-----------|-----------|
| N | 0.245819  | -0.222681 | 0.097028  |
| C | 0.407298  | -0.014446 | 1.382624  |
| C | 1.632849  | 0.159107  | 2.056603  |
| C | 2.798315  | 0.272136  | 1.303510  |
| C | 2.668802  | 0.042252  | -0.073278 |
| C | 1.406756  | -0.191488 | -0.618628 |
| C | 1.269598  | 0.380287  | 3.422966  |
| C | -0.170305 | 0.202609  | 3.486616  |
| N | -0.700568 | -0.046301 | 2.320009  |
| N | -4.244692 | -0.584299 | 1.228377  |
| C | -5.553228 | -0.398139 | 1.804771  |
| C | -6.667305 | -0.145354 | 1.032411  |
| C | -6.623509 | 0.135155  | -0.342685 |
| C | -5.298540 | 0.052792  | -0.936520 |
| C | -4.207229 | -0.166694 | -0.124321 |
| C | -4.775301 | 0.275423  | -2.247078 |
| C | -3.403572 | 0.104273  | -2.195086 |
| N | -3.052430 | -0.169445 | -0.885611 |
| H | -3.514597 | -0.148303 | 1.782466  |
| H | -2.118234 | -0.322624 | -0.543671 |
| H | 3.767660  | 0.455239  | 1.753000  |
| H | 3.529835  | 0.074343  | -0.729948 |
| H | 1.296866  | -0.379473 | -1.680589 |
| H | -7.517564 | 0.271878  | -0.937529 |
| H | -7.616132 | -0.109922 | 1.559932  |
| H | -5.618703 | -0.636286 | 2.858657  |
| H | 1.933844  | 0.561112  | 4.260313  |
| H | -0.773455 | 0.247333  | 4.382209  |
| H | -2.650375 | 0.229053  | -2.953173 |
| H | -5.343161 | 0.482591  | -3.143175 |
